# Supplementary material for: Systematic characterization of m6A proteomics across 12 cancer types: a multi-omics integration study
Source: Royal Society of Chemistry journal article supplement (doi:10.1039/d3mo00171g), 2023-11-09

Supplementary Materials

|                                                                                                                         |    |
|-------------------------------------------------------------------------------------------------------------------------|----|
| Supplementary Materials .....                                                                                           | 1  |
| Table S1. Study characteristics of the pan-cancer datasets .....                                                        | 3  |
| Table S2. Sample size of tumor-normal pairs in each cancer type .....                                                   | 4  |
| Table S3. The descriptions of 30 m6A proteins enrolled in this study .....                                              | 5  |
| Table S4. The fold change of 30 m6A proteins in each cancer type.....                                                   | 6  |
| Table S5. Association of 30 m6A proteins and overall survival in pan-cancer .....                                       | 7  |
| Table S6. The Univariate Cox regression of m6Ascore in each cancer.....                                                 | 8  |
| Table S7. The association between m6Ascore and immune checkpoint .....                                                  | 9  |
| Table S8. The association between m6Ascore and 28 immune pathways.....                                                  | 10 |
| Table S9. The fold change of 51 potential proteins in each cancer type.....                                             | 11 |
| Table S10. The mutation frequency (%) of potential regulators across 10 cancer types .....                              | 12 |
| Table S11. Comparison of ssGSEA enrichment score of the PI3K-AKT and mTOR pathways in high- and low-CHORDC1 group. .... | 13 |
| Figure S1. Nine significant m6A prognostic proteins were correlation with PGR, ERS1 and ERBB3 in Breast cancer .....    | 14 |
| Figure S2. Nine significant m6A prognostic proteins differed in abundance between LUAD and LUSC.....                    | 15 |
| Figure S3. Kaplan-Meier survival analysis of <i>m6Ascore</i> in CPTAC project.....                                      | 16 |
| Figure S4. The OncoScore system to evaluate 51 potential proteins.....                                                  | 17 |
| Figure S5. Somatic mutation frequency analysis of 51 potential regulators.....                                          | 18 |
| Figure S6. Kaplan-Meier survival analysis of CHORDC1 protein in CPTAC project .....                                     | 19 |
| Figure S7. Meta-analysis of the associations of CHORDC1 protein expression and overall survival in CPTAC project .....  | 20 |
| Figure S8. Correlation between ROCK1 protein expression and CHORDC1 protein expression .....                            | 21 |
| Figure S9. The 17 known biological pathways that are associated with the CHORDC1 protein expression. 22                 |    |



**Table S1. Study characteristics of the pan-cancer datasets**

| <b>Cancer type</b> | <b>Cancer full name</b>               | <b>Protein</b> | <b>RNA-Seq</b> | <b>miRNA-seq</b> | <b>Final</b> | <b>Age (mean±sd)</b> | <b>Gender (male/female)</b> | <b>Death proportion (%)</b> |
|--------------------|---------------------------------------|----------------|----------------|------------------|--------------|----------------------|-----------------------------|-----------------------------|
| BRCA               | Breast Invasive Carcinoma             | 116            | 120            | 101              | 94           | 60.82±13.87          | 0/94                        | 2.13                        |
| COAD               | Colon Adenocarcinoma                  | 95             | 100            | 99               | 94           | 65.46±11.26          | 39/55                       | 8.51                        |
| GBM                | Glioblastoma                          | 99             | 99             | 98               | 98           | 57.81±12.53          | 54/44                       | 67.35                       |
| HNSC               | Head and Neck Squamous Cell Carcinoma | 70             | 110            | 109              | 68           | 61.21±9.48           | 61/7                        | 14.71                       |
| KIRC               | Clear Cell Renal Cell Carcinoma       | 160            | 110            | 110              | 110          | 60.55±12.18          | 80/30                       | 10.91                       |
| LIHC               | Hepatocellular Carcinoma              | 160            | 0              | 0                | 0            | 53.53±10.87          | 128/32                      | 34                          |
| LUAD               | Lung Adenocarcinoma                   | 109            | 111            | 111              | 109          | 62.65±9.68           | 73/36                       | 18.35                       |
| LUSC               | Lung Squamous Cell Carcinoma          | 108            | 108            | 107              | 107          | 65.84±8.25           | 85/22                       | 18.69                       |
| OV                 | Ovarian Serous Cystadenocarcinoma     | 100            | 101            | 101              | 97           | 59.63±10.11          | 0/97                        | 7.22                        |
| PBT                | Pediatric/AYA Brain Tumors            | 66             | 0              | 0                | 0            | 7.62±5.19            | 43/23                       | 23                          |
| PDAC               | Pancreatic Ductal Adenocarcinoma      | 137            | 140            | 140              | 137          | 64.14±11.15          | 71/66                       | 63.5                        |
| UCEC               | Uterine Corpus Endometrial Carcinoma  | 100            | 100            | 99               | 99           | 63.34±9.78           | 0/99                        | 6.06                        |
| Total              |                                       | 1320           | 1099           | 1075             | 1013         |                      |                             |                             |

**Table S2. Sample size of tumor-normal pairs in each cancer type**

| <b>Cancer type</b> | <b>Cancer full name</b>               | <b>Protein-tumor</b> | <b>Protein-normal</b> | <b>Final</b> |
|--------------------|---------------------------------------|----------------------|-----------------------|--------------|
| BRCA               | Breast Invasive Carcinoma             | 116                  | 18                    | 17           |
| COAD               | Colon Adenocarcinoma                  | 95                   | 100                   | 94           |
| GBM                | Glioblastoma                          | 99                   | 10                    | 0            |
| HNSC               | Head and Neck Squamous Cell Carcinoma | 70                   | 73                    | 32           |
| KIRC               | Clear Cell Renal Cell Carcinoma       | 160                  | 84                    | 84           |
| LIHC               | Hepatocellular Carcinoma              | 160                  | 160                   | 160          |
| LUAD               | Lung Adenocarcinoma                   | 109                  | 102                   | 100          |
| LUSC               | Lung Squamous Cell Carcinoma          | 108                  | 100                   | 100          |
| OV                 | Ovarian Serous Cystadenocarcinoma     | 100                  | 25                    | 16           |
| PBT                | Pediatric/AYA Brain Tumors            | 66                   | 77                    | 9            |
| PDAC               | Pancreatic Ductal Adenocarcinoma      | 137                  | 66                    | 66           |
| UCEC               | Uterine Corpus Endometrial Carcinoma  | 100                  | 30                    | 30           |
| Total              |                                       | 1320                 | 845                   | 708          |

**Table S3. The descriptions of 30 m6A proteins enrolled in this study**

| Official symbol | Description                                          | Category |
|-----------------|------------------------------------------------------|----------|
| METTL3          | Methyltransferase like 3                             | Writer   |
| METTL14         | Methyltransferase like 14                            | Writer   |
| METTL16         | Methyltransferase like 16                            | Writer   |
| METTL5          | Methyltransferase like 5                             | Writer   |
| WTAP            | WT1 associated protein                               | Writer   |
| VIRMA           | Vir like m6A methyltransferase associated            | Writer   |
| RBM15           | RNA binding motif protein 15                         | Writer   |
| RBM15B          | RNA binding motif protein 15B                        | Writer   |
| ZC3H13          | Zinc finger CCCH-type containing 13                  | Writer   |
| CBLL1           | Cbl proto-oncogene like 1                            | Writer   |
| FTO             | FTO alpha-ketoglutarate dependent dioxygenase        | Eraser   |
| ALKBH3          | AlkB homolog 3, RNA demethylase                      | Eraser   |
| ALKBH5          | AlkB homolog 5, RNA demethylase                      | Eraser   |
| YTHDF1          | YTH N6-methyladenosine RNA binding protein 1         | Reader   |
| YTHDF2          | YTH N6-methyladenosine RNA binding protein 2         | Reader   |
| YTHDF3          | YTH N6-methyladenosine RNA binding protein 3         | Reader   |
| YTHDC1          | YTH domain containing 1                              | Reader   |
| YTHDC2          | YTH domain containing 2                              | Reader   |
| HNRNPA2B1       | Heterogeneous nuclear ribonucleoprotein A2/B1        | Reader   |
| HNRNPC          | Heterogeneous nuclear ribonucleoprotein C            | Reader   |
| FMR1            | FMRP translational regulator 1                       | Reader   |
| EIF3A           | Eukaryotic translation initiation factor 3 subunit A | Reader   |
| IGF2BP1         | Insulin like growth factor 2 mRNA binding protein 1  | Reader   |
| IGF2BP2         | Insulin like growth factor 2 mRNA binding protein 2  | Reader   |
| IGF2BP3         | Insulin like growth factor 2 mRNA binding protein 3  | Reader   |
| ELAVL1          | ELAV like RNA binding protein 1                      | Reader   |
| G3BP1           | G3BP stress granule assembly factor 1                | Reader   |
| G3BP2           | G3BP stress granule assembly factor 2                | Reader   |
| PRRC2A          | Proline rich coiled-coil 2A                          | Reader   |
| RBMX            | RNA binding motif protein X-linked                   | Reader   |

**Table S4. The fold change of 30 m6A proteins in each cancer type**

| Protein   | BRCA  | COAD | HNSC | KIRC | LIHC | LUAD | LUSC | OV   | PBT  | PDAC | UCEC |
|-----------|-------|------|------|------|------|------|------|------|------|------|------|
| ALKBH3    | 1.13  | 0.94 | 0.99 | 0.95 | 0.85 | 0.95 | 1.32 | 0.63 | 0.81 | 0.66 | 0.55 |
| ALKBH5    | 1.97  | 1.35 | 1.67 | 1.65 | 1.12 | 1.13 | 1.28 | 0.97 | 1.26 | 0.96 | 0.82 |
| CBLL1     | 1.10  | 1.35 | 1.36 | 1.46 | 1.31 | 1.25 | 1.17 | 1.11 | 1.41 | 0.71 | 0.91 |
| EIF3A     | 1.57  | 1.29 | 1.45 | 1.39 | 1.13 | 1.16 | 1.08 | 1.09 | 0.86 | 0.72 | 0.79 |
| ELAVL1    | 1.51  | 1.15 | 1.44 | 1.30 | 1.24 | 1.40 | 1.15 | 1.00 | 1.37 | 0.97 | 0.86 |
| FMR1      | 1.98  | 1.19 | 1.43 | 1.26 | 1.47 | 1.39 | 0.84 | 1.08 | 1.14 | 1.21 | 1.28 |
| FTO       | 0.98  | 1.10 | 0.97 | 1.13 | 1.00 | 0.93 | 1.38 | 0.64 | 0.70 | 0.87 | 0.79 |
| G3BP1     | 1.39  | 1.46 | 1.67 | 1.58 | 1.42 | 1.66 | 1.27 | 1.55 | 1.55 | 0.96 | 1.11 |
| G3BP2     | 2.24  | 1.49 | 1.51 | 1.50 | 1.15 | 1.13 | 0.97 | 1.28 | 1.90 | 1.03 | 1.11 |
| HNRNPA2B1 | 1.20  | 1.20 | 1.10 | 1.16 | 1.27 | 1.46 | 1.02 | 1.10 | 1.81 | 0.99 | 0.92 |
| HNRNPC    | 1.72  | 1.44 | 1.56 | 1.52 | 1.39 | 1.55 | 1.05 | 1.23 | 2.66 | 0.98 | 0.98 |
| IGF2BP1   | 1.37  | 1.88 | 4.95 | 5.95 | 5.32 | 2.43 | 1.34 | 1.94 | 0.54 | 1.92 | 2.08 |
| IGF2BP2   | 0.92  | 1.02 | 4.28 | 3.14 | 4.46 | 1.82 | 0.82 | 0.61 | 1.64 | 2.26 | 1.96 |
| IGF2BP3   | 10.82 | 2.55 | 8.95 | 6.52 | 5.82 | 2.56 | 3.48 | 1.89 | 0.65 | 3.11 | 4.14 |
| METTL14   | 1.62  | 1.24 | 1.00 | 1.11 | 1.33 | 0.90 | 1.09 | 0.91 | 0.83 | 0.93 | 0.85 |
| METTL16   | 1.33  | 1.00 | 1.06 | 1.06 | 1.09 | 1.02 | 1.27 | 0.53 | 0.93 | 1.00 | 0.64 |
| METTL3    | 1.14  | 1.11 | 1.09 | 1.12 | 1.42 | 0.99 | 1.13 | 0.91 | 1.17 | 0.98 | 0.87 |
| METTL5    | 0.68  | 0.94 | 1.43 | 1.22 | 1.37 | 1.15 | 1.64 | 1.29 | 0.60 | 1.08 | 1.34 |
| PRRC2A    | 1.97  | 1.38 | 1.62 | 1.67 | 1.49 | 1.35 | 1.07 | 1.13 | 1.97 | 0.92 | 0.98 |
| RBM15     | 2.41  | 1.30 | 1.38 | 1.41 | 1.29 | 1.30 | 1.21 | 1.20 | 1.49 | 1.14 | 1.09 |
| RBM15B    | 1.66  | 1.15 | 1.38 | 1.21 | 1.31 | 1.15 | 0.99 | 0.97 | 1.42 | 0.91 | 1.01 |
| RBMX      | 1.24  | 1.42 | 1.36 | 1.38 | 1.59 | 1.58 | 1.18 | 1.20 | 2.21 | 1.20 | 1.13 |
| VIRMA     | 1.47  | 1.12 | 1.49 | 1.40 | 1.26 | 1.28 | 1.17 | 1.23 | 0.64 | 1.09 | 0.98 |
| WTAP      | 2.15  | 1.28 | 1.64 | 1.58 | 1.44 | 1.29 | 1.24 | 1.11 | 1.03 | 1.05 | 1.04 |
| YTHDC1    | 2.07  | 1.39 | 1.67 | 1.63 | 1.37 | 1.52 | 1.11 | 0.98 | 1.32 | 1.18 | 1.08 |
| YTHDC2    | 0.91  | 1.12 | 1.32 | 1.16 | 1.08 | 1.17 | 1.37 | 1.53 | 0.62 | 0.98 | 1.19 |
| YTHDF1    | 2.39  | 1.63 | 1.66 | 1.77 | 1.56 | 1.63 | 1.09 | 1.26 | 1.16 | 0.94 | 1.15 |
| YTHDF2    | 3.50  | 1.63 | 1.90 | 1.84 | 1.69 | 1.55 | 1.14 | 1.65 | 1.32 | 1.05 | 1.28 |
| YTHDF3    | 2.43  | 1.59 | 1.65 | 1.63 | 1.63 | 1.42 | 1.11 | 1.11 | 1.23 | 0.92 | 1.08 |
| ZC3H13    | 2.07  | 1.30 | 1.44 | 1.52 | 1.32 | 1.13 | 1.18 | 1.08 | 1.45 | 1.00 | 0.98 |

**Table S5. Association of 30 m6A proteins and overall survival in pan-cancer**

| <b>m6A proteins</b> | <b>HR</b> | <b>CI</b> | <b>CU</b> | <b>P</b> | <b>Category</b> |
|---------------------|-----------|-----------|-----------|----------|-----------------|
| METTL3              | 0.75      | 0.48      | 1.19      | 0.2240   | Writer          |
| METTL14             | 0.92      | 0.64      | 1.33      | 0.6577   | Writer          |
| METTL16             | 0.90      | 0.63      | 1.28      | 0.5432   | Writer          |
| METTL5              | 1.07      | 0.75      | 1.54      | 0.7031   | Writer          |
| RBM15               | 1.26      | 0.81      | 1.97      | 0.3033   | Writer          |
| RBM15B              | 1.28      | 0.83      | 1.99      | 0.2613   | Writer          |
| WTAP                | 1.25      | 0.85      | 1.85      | 0.2578   | Writer          |
| VIRMA               | 1.23      | 0.78      | 1.96      | 0.3773   | Writer          |
| ZC3H13              | 1.14      | 0.75      | 1.74      | 0.5377   | Writer          |
| CBLL1               | 1.01      | 0.64      | 1.61      | 0.9635   | Writer          |
| ALKBH5              | 1.51      | 1.07      | 2.14      | 0.0196   | Eraser          |
| ALKBH3              | 0.92      | 0.70      | 1.21      | 0.5459   | Eraser          |
| FTO                 | 1.04      | 0.73      | 1.48      | 0.8226   | Eraser          |
| YTHDC1              | 1.06      | 0.71      | 1.57      | 0.7892   | Reader          |
| YTHDC2              | 0.81      | 0.54      | 1.22      | 0.3190   | Reader          |
| YTHDF1              | 2.34      | 1.46      | 3.75      | 0.0004   | Reader          |
| YTHDF2              | 1.89      | 1.29      | 2.77      | 0.0012   | Reader          |
| YTHDF3              | 1.66      | 1.13      | 2.44      | 0.0091   | Reader          |
| IGF2BP1             | 1.09      | 0.98      | 1.21      | 0.0963   | Reader          |
| IGF2BP2             | 1.22      | 1.08      | 1.38      | 0.0013   | Reader          |
| IGF2BP3             | 1.14      | 1.03      | 1.26      | 0.0081   | Reader          |
| HNRNPA2B1           | 1.14      | 0.66      | 1.96      | 0.6435   | Reader          |
| HNRNPC              | 1.51      | 0.97      | 2.36      | 0.0697   | Reader          |
| RBMX                | 1.28      | 0.86      | 1.89      | 0.2264   | Reader          |
| EIF3A               | 1.72      | 0.90      | 3.26      | 0.0982   | Reader          |
| FMR1                | 1.30      | 0.84      | 2.00      | 0.2361   | Reader          |
| ELAVL1              | 1.33      | 0.86      | 2.05      | 0.1950   | Reader          |
| G3BP1               | 1.82      | 1.13      | 2.94      | 0.0145   | Reader          |
| G3BP2               | 2.01      | 1.28      | 3.14      | 0.0022   | Reader          |
| PRRC2A              | 1.69      | 1.07      | 2.66      | 0.0232   | Reader          |

**Table S6. The Univariate Cox regression of m6Ascore in each cancer**

| Cancer type | Cutoff | HR   | CI   | CU   | P        |
|-------------|--------|------|------|------|----------|
| COAD        | 0.73   | 3.15 | 1.55 | 6.39 | 0.001497 |
| GBM         | -0.29  | 1.41 | 1.11 | 1.79 | 0.004411 |
| HNSC        | 0.63   | 2.23 | 1.43 | 3.50 | 0.000431 |
| KIRC        | 0.95   | 2.56 | 1.71 | 3.83 | 4.95E-06 |
| LUAD        | 0.69   | 2.21 | 1.41 | 3.48 | 0.000603 |
| LUSC        | 0.27   | 2.39 | 1.39 | 4.11 | 0.00169  |
| OV          | 0.49   | 2.37 | 0.89 | 6.32 | 0.085013 |
| PDAC        | 0.04   | 1.98 | 1.58 | 2.47 | 2.63E-09 |
| UCEC        | 0.85   | 2.91 | 1.32 | 6.41 | 0.008017 |



**Table S7. The association between m6Ascore and immune checkpoint**

| <b>Immune check point</b> | <b>Beta</b> | <b>CI</b> | <b>CU</b> | <b>P</b> |
|---------------------------|-------------|-----------|-----------|----------|
| <i>PD-1</i>               | 0.08        | 0.03      | 0.13      | 0.003244 |
| <i>PD-L1</i>              | 0.15        | 0.10      | 0.20      | 4.92E-08 |
| <i>CTLA-4</i>             | 0.01        | -0.06     | 0.07      | 0.855967 |
| <i>PD-L2</i>              | 0.13        | 0.04      | 0.21      | 0.0034   |
| <i>HAVCR2</i>             | 0.09        | 0.02      | 0.17      | 0.014211 |
| <i>LAG3</i>               | 0.04        | -0.04     | 0.12      | 0.308203 |
| <i>VSIR</i>               | -0.02       | -0.08     | 0.05      | 0.621812 |
| <i>B7-H3</i>              | -0.06       | -0.12     | 0.01      | 0.0889   |
| <i>BTLA</i>               | 0.05        | -0.01     | 0.12      | 0.112205 |
| <i>TIGIT</i>              | 0.12        | 0.05      | 0.19      | 0.000742 |

**Table S8. The association between m6Ascore and 28 immune pathways**

| <b>Immune pathways</b>         | <b>Beta</b> | <b>CI</b> | <b>CU</b> | <b>P</b> |
|--------------------------------|-------------|-----------|-----------|----------|
| Activated B cell               | 0.006       | -0.007    | 0.018     | 0.391824 |
| Activated CD4 T cell           | 0.016       | 0.008     | 0.023     | 5.88E-05 |
| Activated CD8 T cell           | 0.007       | -0.001    | 0.015     | 0.092717 |
| Activated dendritic cell       | 0.013       | 0.008     | 0.017     | 2.19E-08 |
| CD56bright natural killer cell | 0.004       | 0.001     | 0.006     | 0.004011 |
| CD56dim natural killer cell    | 0.004       | 0.001     | 0.008     | 0.011631 |
| Central memory CD4 T cell      | 0.011       | 0.008     | 0.013     | 1.09E-14 |
| Central memory CD8 T cell      | 0.019       | 0.014     | 0.023     | 2.2E-16  |
| Effector memory CD4 T cell     | 0.005       | 0.001     | 0.009     | 0.01253  |
| Effector memory CD8 T cell     | 0.013       | 0.007     | 0.018     | 8.9E-06  |
| Eosinophil                     | 0.009       | 0.003     | 0.015     | 0.001992 |
| Gamma delta T cell             | 0.013       | 0.010     | 0.017     | 6.16E-12 |
| Immature B cell                | 0.010       | 0.000     | 0.020     | 0.051587 |
| Immature dendritic cell        | 0.010       | 0.007     | 0.014     | 7.94E-11 |
| Macrophage                     | 0.022       | 0.015     | 0.028     | 3.63E-11 |
| Mast cell                      | 0.011       | 0.003     | 0.018     | 0.003942 |
| MDSC                           | 0.021       | 0.014     | 0.028     | 2.68E-08 |
| Memory B cell                  | 0.011       | 0.007     | 0.015     | 2.87E-08 |
| Monocyte                       | 0.005       | 0.002     | 0.009     | 0.003283 |
| Natural killer cell            | 0.010       | 0.007     | 0.014     | 2.2E-08  |
| Natural killer T cell          | 0.013       | 0.009     | 0.018     | 1.64E-09 |
| Neutrophil                     | 0.014       | 0.003     | 0.025     | 0.011214 |
| Plasmacytoid dendritic cell    | 0.009       | 0.006     | 0.012     | 1.13E-10 |
| Regulatory T cell              | 0.027       | 0.019     | 0.034     | 1.5E-12  |
| T follicular helper cell       | 0.012       | 0.008     | 0.017     | 1.05E-07 |
| Type 1 T helper cell           | 0.012       | 0.008     | 0.017     | 3.18E-07 |
| Type 17 T helper cell          | 0.006       | 0.002     | 0.010     | 0.004461 |
| Type 2 T helper cell           | 0.016       | 0.012     | 0.020     | 1.1E-14  |

**Table S9. The fold change of 51 potential proteins in each cancer type**

| Potential protein | BRCA | COAD | HNSC  | KIRC | LIHC | LUAD | LUSC | OV   | PBT  | PDAC | UCEC |
|-------------------|------|------|-------|------|------|------|------|------|------|------|------|
| CHORDC1           | 2.33 | 1.19 | 1.10  | 0.77 | 1.91 | 1.73 | 2.01 | 2.16 | 1.02 | 1.21 | 1.29 |
| FAM114A1          | 0.62 | 0.69 | 1.94  | 1.22 | 0.91 | 1.56 | 1.15 | 1.47 | 1.05 | 0.98 | 0.53 |
| BMP1              | 2.41 | 1.96 | 3.18  | 0.62 | 1.22 | 1.86 | 2.61 | 1.06 | 1.59 | 2.66 | 1.41 |
| CALU              | 0.87 | 1.19 | 2.46  | 1.00 | 1.81 | 2.09 | 1.81 | 2.43 | 1.39 | 1.26 | 1.11 |
| COLGALT1          | 1.50 | 1.63 | 3.92  | 0.72 | 1.42 | 1.17 | 1.47 | 0.91 | 1.00 | 1.99 | 1.61 |
| ENY2              | 1.66 | 1.15 | 0.87  | 1.01 | 1.53 | 1.18 | 1.42 | 2.04 | 0.70 | 0.98 | 0.85 |
| FKBP10            | 2.07 | 2.44 | 4.85  | 0.83 | 2.52 | 2.38 | 2.58 | 1.44 | 1.31 | 1.81 | 1.35 |
| IFI35             | 1.58 | 1.14 | 2.75  | 0.79 | 1.19 | 1.36 | 1.45 | 1.78 | 0.82 | 1.41 | 1.25 |
| MMP14             | 1.21 | 1.67 | 3.79  | 0.67 | 1.83 | 1.66 | 2.46 | 0.87 | 2.17 | 2.51 | 1.83 |
| NFKB2             | 1.56 | 1.16 | 2.03  | 0.86 | 1.75 | 1.34 | 1.41 | 1.14 | 1.01 | 1.38 | 0.78 |
| NUP98             | 1.23 | 1.44 | 1.20  | 0.92 | 1.42 | 1.23 | 1.41 | 1.28 | 1.05 | 0.97 | 0.92 |
| P3H1              | 2.01 | 2.45 | 2.56  | 0.79 | 1.66 | 1.98 | 2.40 | 1.05 | 0.84 | 1.88 | 1.40 |
| P3H4              | 3.12 | 1.98 | 2.06  | 0.73 | 1.92 | 2.59 | 3.12 | 0.68 | 1.04 | 2.21 | 1.27 |
| PLOD1             | 2.10 | 1.99 | 3.23  | 0.66 | 1.67 | 1.72 | 2.24 | 1.19 | 1.24 | 2.17 | 1.67 |
| RCN1              | 0.59 | 2.18 | 2.55  | 1.11 | 0.91 | 1.62 | 1.44 | 2.03 | 1.28 | 1.51 | 1.64 |
| SPATS2            | 3.44 | 1.09 | 1.55  | 0.92 | 2.40 | 2.15 | 2.56 | 1.88 | 1.00 | 1.02 | 1.75 |
| TIGAR             | 2.05 | 1.23 | 1.65  | 0.83 | 1.33 | 1.14 | 1.31 | 1.33 | 0.94 | 1.70 | 1.55 |
| ANKHD1            | 1.64 | 1.30 | 1.34  | 1.01 | 1.42 | 1.33 | 1.23 | 1.01 | 1.16 | 0.81 | 1.14 |
| ATF2              | 1.20 | 1.19 | 1.70  | 1.02 | 1.37 | 1.33 | 1.17 | 2.37 | 1.05 | 1.00 | 0.65 |
| BOP1              | 2.32 | 2.11 | 1.59  | 0.83 | 1.82 | 1.45 | 1.99 | 1.45 | 0.81 | 0.97 | 1.17 |
| BRIX1             | 2.35 | 1.95 | 2.79  | 0.83 | 1.73 | 1.72 | 2.08 | 0.95 | 0.43 | 1.47 | 1.55 |
| C1orf174          | 2.72 | 1.09 | 1.17  | 0.95 | 1.07 | 1.38 | 1.27 | 2.06 | 1.16 | 0.74 | 1.08 |
| CRTAP             | 1.35 | 2.03 | 2.20  | 0.77 | 2.12 | 2.02 | 2.22 | 0.72 | 1.39 | 1.98 | 1.17 |
| CWC27             | 1.12 | 1.08 | 1.22  | 1.02 | 1.43 | 1.15 | 1.27 | 1.74 | 0.98 | 0.89 | 0.89 |
| ERO1A             | 4.03 | 2.00 | 4.47  | 1.06 | 1.36 | 3.81 | 3.74 | 1.36 | 1.28 | 1.74 | 2.91 |
| ETV6              | 1.16 | 1.18 | 1.64  | 1.18 | 1.06 | 1.55 | 1.77 | 1.32 | 1.32 | 1.59 | 1.76 |
| IKBIP             | 1.73 | 2.05 | 5.68  | 0.69 | 2.15 | 1.81 | 1.81 | 1.29 | 1.36 | 1.96 | 1.35 |
| JUNB              | 2.63 | 1.88 | 1.72  | 0.82 | 1.32 | 1.23 | 1.66 | 1.44 | 1.50 | 2.21 | 0.72 |
| LOXL2             | 2.38 | 1.64 | 11.41 | 0.43 | 2.93 | 2.60 | 4.19 | 2.03 | 5.35 | 5.45 | 1.62 |
| MICALL2           | 1.78 | 1.14 | 1.30  | 0.91 | 0.64 | 1.61 | 1.19 | 1.10 | 1.40 | 2.19 | 1.32 |
| NMI               | 2.29 | 1.11 | 2.91  | 0.75 | 1.27 | 1.54 | 1.49 | 2.02 | 0.67 | 1.94 | 1.35 |
| P4HA1             | 2.81 | 2.57 | 5.80  | 0.69 | 1.77 | 3.02 | 3.03 | 2.33 | 1.92 | 2.83 | 2.06 |
| P4HA2             | 2.45 | 1.71 | 6.05  | 0.56 | 2.59 | 2.37 | 2.69 | 1.69 | 0.99 | 2.32 | 1.87 |
| PKM               | 1.16 | 1.28 | 3.48  | 0.98 | 1.66 | 1.35 | 1.45 | 1.65 | 1.07 | 1.86 | 1.26 |
| PLIN3             | 1.11 | 1.17 | 2.45  | 0.95 | 0.94 | 1.46 | 1.17 | 1.59 | 0.87 | 1.38 | 0.99 |
| POLR2C            | 1.20 | 1.26 | 1.16  | 0.96 | 1.26 | 1.12 | 1.10 | 1.55 | 0.92 | 0.89 | 0.86 |
| PPP1R18           | 2.75 | 1.10 | 2.41  | 0.84 | 1.15 | 1.14 | 1.07 | 1.56 | 1.00 | 1.82 | 0.73 |
| RANBP2            | 2.03 | 1.55 | 1.09  | 0.88 | 1.47 | 1.40 | 1.56 | 1.44 | 1.03 | 0.93 | 1.08 |
| RCOR1             | 1.93 | 1.32 | 1.19  | 1.00 | 1.41 | 1.44 | 1.69 | 2.05 | 1.09 | 1.04 | 1.31 |
| RPRD2             | 1.17 | 1.30 | 1.02  | 1.00 | 1.81 | 1.40 | 1.41 | 1.00 | 0.97 | 0.98 | 0.99 |
| RUNX1             | 0.81 | 1.26 | 2.16  | 0.88 | 0.85 | 1.16 | 1.36 | 1.24 | 1.23 | 1.82 | 1.71 |
| SERPINH1          | 1.21 | 2.37 | 2.60  | 0.83 | 1.85 | 2.05 | 2.07 | 1.81 | 1.49 | 1.81 | 1.27 |
| SNRPG             | 2.45 | 1.57 | 1.11  | 1.01 | 1.42 | 1.19 | 1.18 | 2.44 | 0.94 | 1.41 | 1.16 |
| SUDS3             | 1.01 | 1.09 | 1.19  | 1.02 | 1.20 | 1.15 | 1.33 | 1.47 | 1.03 | 0.73 | 0.73 |
| TCEA1             | 1.92 | 1.28 | 1.15  | 0.88 | 1.59 | 1.49 | 1.48 | 1.95 | 0.97 | 0.93 | 1.01 |
| TCERG1            | 1.47 | 1.46 | 1.24  | 0.96 | 1.54 | 1.49 | 1.42 | 1.74 | 1.05 | 1.08 | 0.98 |
| TRADD             | 0.80 | 0.73 | 2.67  | 1.07 | 0.84 | 1.19 | 1.01 | 1.33 | 2.61 | 1.33 | 0.90 |
| U2SURP            | 2.79 | 1.62 | 1.03  | 0.91 | 1.65 | 1.35 | 1.85 | 1.41 | 0.86 | 1.07 | 1.31 |
| WDR12             | 2.03 | 2.21 | 1.36  | 0.80 | 2.58 | 2.08 | 3.38 | 1.50 | 0.98 | 0.97 | 1.49 |
| ZFR               | 1.69 | 1.35 | 1.03  | 0.89 | 1.38 | 1.41 | 1.71 | 1.02 | 0.98 | 1.01 | 0.95 |
| ZMYND8            | 2.41 | 1.45 | 1.16  | 0.84 | 1.56 | 1.60 | 1.85 | 1.40 | 0.96 | 1.18 | 1.65 |

**Table S10. The mutation frequency (%) of potential regulators across 10 cancer types**

| Potential regulators | BRCA | COAD | GBM  | HNSC | KIRC | LUAD | LUSC | OV   | PDAC | UCEC |
|----------------------|------|------|------|------|------|------|------|------|------|------|
| RUNX1                | 3.57 | 3.03 | 4.04 | 0.93 | 0.00 | 2.75 | 0.93 | 2.08 | 0.72 | 3.00 |
| RPRD2                | 0.89 | 3.03 | 1.01 | 1.85 | 4.59 | 3.67 | 0.93 | 2.08 | 0.00 | 6.00 |
| RANBP2               | 0.00 | 6.06 | 1.01 | 1.85 | 2.75 | 1.83 | 4.63 | 2.08 | 0.72 | 7.00 |
| NUP98                | 0.00 | 6.06 | 1.01 | 0.93 | 0.92 | 0.92 | 5.56 | 1.04 | 0.72 | 5.00 |
| ZFR                  | 0.00 | 4.04 | 1.01 | 1.85 | 1.83 | 1.83 | 2.78 | 1.04 | 0.72 | 3.00 |
| ZMYND8               | 0.89 | 4.04 | 0.00 | 1.85 | 1.83 | 1.83 | 0.93 | 1.04 | 0.00 | 5.00 |
| ETV6                 | 0.89 | 4.04 | 0.00 | 0.93 | 0.00 | 0.92 | 0.93 | 0.00 | 0.72 | 2.00 |
| MICALL2              | 0.89 | 1.01 | 0.00 | 2.78 | 0.00 | 0.92 | 0.00 | 1.04 | 0.72 | 3.00 |
| P4HA2                | 0.00 | 2.02 | 1.01 | 0.93 | 0.92 | 0.00 | 2.78 | 2.08 | 0.00 | 3.00 |
| PLOD1                | 0.89 | 2.02 | 0.00 | 0.00 | 0.92 | 0.00 | 2.78 | 1.04 | 0.00 | 3.00 |
| TCERG1               | 0.00 | 9.09 | 0.00 | 0.00 | 0.00 | 1.83 | 0.93 | 2.08 | 0.72 | 7.00 |
| P3H1                 | 0.00 | 3.03 | 0.00 | 0.93 | 0.92 | 0.92 | 0.00 | 1.04 | 0.00 | 3.00 |
| SPATS2               | 0.00 | 2.02 | 0.00 | 0.93 | 1.83 | 0.92 | 0.00 | 1.04 | 0.00 | 2.00 |
| BOP1                 | 0.00 | 2.02 | 0.00 | 1.85 | 0.92 | 0.00 | 1.85 | 1.04 | 0.00 | 2.00 |
| COLGALT1             | 0.89 | 2.02 | 1.01 | 0.00 | 0.00 | 0.00 | 0.93 | 0.00 | 0.00 | 3.00 |
| SUDS3                | 0.89 | 0.00 | 0.00 | 0.93 | 0.92 | 0.00 | 0.00 | 1.04 | 0.00 | 2.00 |
| JUNB                 | 0.00 | 1.01 | 0.00 | 1.85 | 0.00 | 0.00 | 2.78 | 0.00 | 0.72 | 1.00 |
| PPP1R18              | 0.00 | 3.03 | 1.01 | 0.93 | 0.00 | 0.92 | 0.00 | 0.00 | 0.00 | 3.00 |
| PLIN3                | 0.00 | 1.01 | 1.01 | 0.00 | 0.00 | 0.92 | 0.00 | 1.04 | 0.00 | 1.00 |
| U2SURP               | 0.00 | 5.05 | 0.00 | 2.78 | 0.00 | 3.67 | 1.85 | 0.00 | 0.00 | 4.00 |
| P4HA1                | 0.00 | 3.03 | 0.00 | 0.00 | 0.00 | 0.92 | 1.85 | 1.04 | 0.00 | 1.00 |
| BMP1                 | 0.00 | 4.04 | 0.00 | 0.93 | 0.00 | 0.92 | 0.93 | 0.00 | 0.00 | 5.00 |
| CALU                 | 1.79 | 0.00 | 0.00 | 0.00 | 0.00 | 0.00 | 0.93 | 1.04 | 0.00 | 1.00 |
| RCN1                 | 0.89 | 0.00 | 0.00 | 0.00 | 0.92 | 0.92 | 0.00 | 0.00 | 0.00 | 2.00 |
| NFKB2                | 0.89 | 4.04 | 0.00 | 0.00 | 0.00 | 1.83 | 0.00 | 0.00 | 0.00 | 2.00 |
| FKBP10               | 0.00 | 1.01 | 0.00 | 1.85 | 0.92 | 0.00 | 0.00 | 0.00 | 0.00 | 1.00 |
| MMP14                | 0.00 | 3.03 | 1.01 | 0.00 | 0.00 | 0.92 | 0.00 | 1.04 | 0.00 | 0.00 |
| SERPINH1             | 0.00 | 2.02 | 0.00 | 0.00 | 0.00 | 0.92 | 0.93 | 0.00 | 0.00 | 4.00 |
| LOXL2                | 0.00 | 3.03 | 0.00 | 0.00 | 0.00 | 0.92 | 0.00 | 1.04 | 0.00 | 5.00 |
| TRADD                | 0.00 | 2.02 | 0.00 | 0.00 | 0.00 | 1.83 | 1.85 | 1.04 | 0.00 | 0.00 |
| RCOR1                | 0.00 | 3.03 | 0.00 | 0.00 | 0.00 | 2.75 | 1.85 | 1.04 | 0.00 | 0.00 |
| BRIX1                | 0.00 | 1.01 | 0.00 | 0.93 | 0.00 | 0.92 | 0.00 | 1.04 | 0.00 | 0.00 |
| ATF2                 | 0.00 | 1.01 | 0.00 | 0.00 | 0.00 | 0.00 | 1.85 | 1.04 | 0.00 | 5.00 |
| FAM114A1             | 0.00 | 1.01 | 0.00 | 0.93 | 0.00 | 0.00 | 0.00 | 1.04 | 0.00 | 3.00 |
| TCEA1                | 0.00 | 1.01 | 0.00 | 0.00 | 0.92 | 0.00 | 2.78 | 0.00 | 0.00 | 4.00 |
| IKBIP                | 0.00 | 0.00 | 1.01 | 0.00 | 0.00 | 0.92 | 0.00 | 1.04 | 0.00 | 1.00 |
| CWC27                | 0.89 | 4.04 | 0.00 | 0.00 | 0.00 | 0.92 | 0.00 | 0.00 | 0.00 | 0.00 |
| C1orf174             | 0.00 | 2.02 | 0.00 | 0.00 | 0.00 | 1.83 | 0.00 | 0.00 | 0.00 | 2.00 |
| WDR12                | 0.00 | 1.01 | 0.00 | 0.93 | 0.00 | 0.00 | 0.00 | 0.00 | 0.00 | 1.00 |
| CRTAP                | 0.00 | 0.00 | 0.00 | 0.93 | 0.00 | 0.00 | 0.93 | 0.00 | 0.00 | 1.00 |
| P3H4                 | 0.00 | 1.01 | 0.00 | 0.93 | 0.00 | 0.00 | 0.00 | 0.00 | 0.00 | 0.00 |
| NMI                  | 0.00 | 2.02 | 0.00 | 0.00 | 0.00 | 0.00 | 0.00 | 0.00 | 0.00 | 1.00 |
| CHORDC1              | 0.00 | 2.02 | 0.00 | 0.00 | 0.00 | 0.00 | 0.00 | 0.00 | 0.72 | 0.00 |
| PKM                  | 0.00 | 2.02 | 0.00 | 0.00 | 0.00 | 0.00 | 0.00 | 0.00 | 0.00 | 1.00 |
| POLR2C               | 0.00 | 0.00 | 0.00 | 0.00 | 0.92 | 0.00 | 0.00 | 0.00 | 0.00 | 2.00 |
| ENY2                 | 0.89 | 0.00 | 0.00 | 0.00 | 0.00 | 0.00 | 0.00 | 0.00 | 0.00 | 0.00 |
| IFI35                | 0.00 | 0.00 | 0.00 | 0.00 | 0.00 | 0.00 | 0.00 | 0.00 | 0.00 | 1.00 |
| ANKHD1               | 0.00 | 0.00 | 0.00 | 0.00 | 0.00 | 0.00 | 0.00 | 0.00 | 0.00 | 1.00 |
| TIGAR                | 0.00 | 0.00 | 0.00 | 0.00 | 0.00 | 0.00 | 0.00 | 0.00 | 0.00 | 0.00 |
| ERO1A                | 0.00 | 0.00 | 0.00 | 0.00 | 0.00 | 0.00 | 0.00 | 0.00 | 0.00 | 0.00 |
| SNRPG                | 0.00 | 0.00 | 0.00 | 0.00 | 0.00 | 0.00 | 0.00 | 0.00 | 0.00 | 0.00 |

**Table S11. Comparison of ssGSEA enrichment score of the PI3K-AKT and mTOR pathways in high- and low-CHORDC1 group.**

| Pathways               | Ctype | High CHORDC1 group | Low CHORDC1 group | P        |
|------------------------|-------|--------------------|-------------------|----------|
| MTOR_SIGNALING_PATHWAY | COAD  | 4.31               | 4.07              | 1.15E-42 |
| PI3K_AKT_Pathway       | COAD  | 3.59               | 3.37              | 1.16E-19 |
| MTOR_SIGNALING_PATHWAY | HNSC  | 3.71               | 3.54              | 2.85E-10 |
| PI3K_AKT_Pathway       | HNSC  | 2.96               | 2.85              | 4.94E-05 |
| MTOR_SIGNALING_PATHWAY | KIRC  | 2.94               | 2.71              | 1.52E-13 |
| PI3K_AKT_Pathway       | KIRC  | 2.25               | 2.1               | 4.05E-10 |
| MTOR_SIGNALING_PATHWAY | LUSC  | 3.13               | 2.93              | 5.16E-26 |
| PI3K_AKT_Pathway       | LUSC  | 2.41               | 2.35              | 0.001784 |
| MTOR_SIGNALING_PATHWAY | OV    | 3.27               | 3.13              | 4.79E-17 |
| PI3K_AKT_Pathway       | OV    | 2.57               | 2.49              | 0.000379 |
| MTOR_SIGNALING_PATHWAY | UCEC  | 2.89               | 2.66              | 1.93E-38 |
| PI3K_AKT_Pathway       | UCEC  | 2.16               | 2                 | 1.76E-14 |
| PI3K_AKT_Pathway       | HNSC  | 2.96               | 2.85              | 4.94E-05 |

**Figure S1. Nine significant m6A prognostic proteins were correlation with PGR, ESR1 and ERBB3 in Breast cancer**

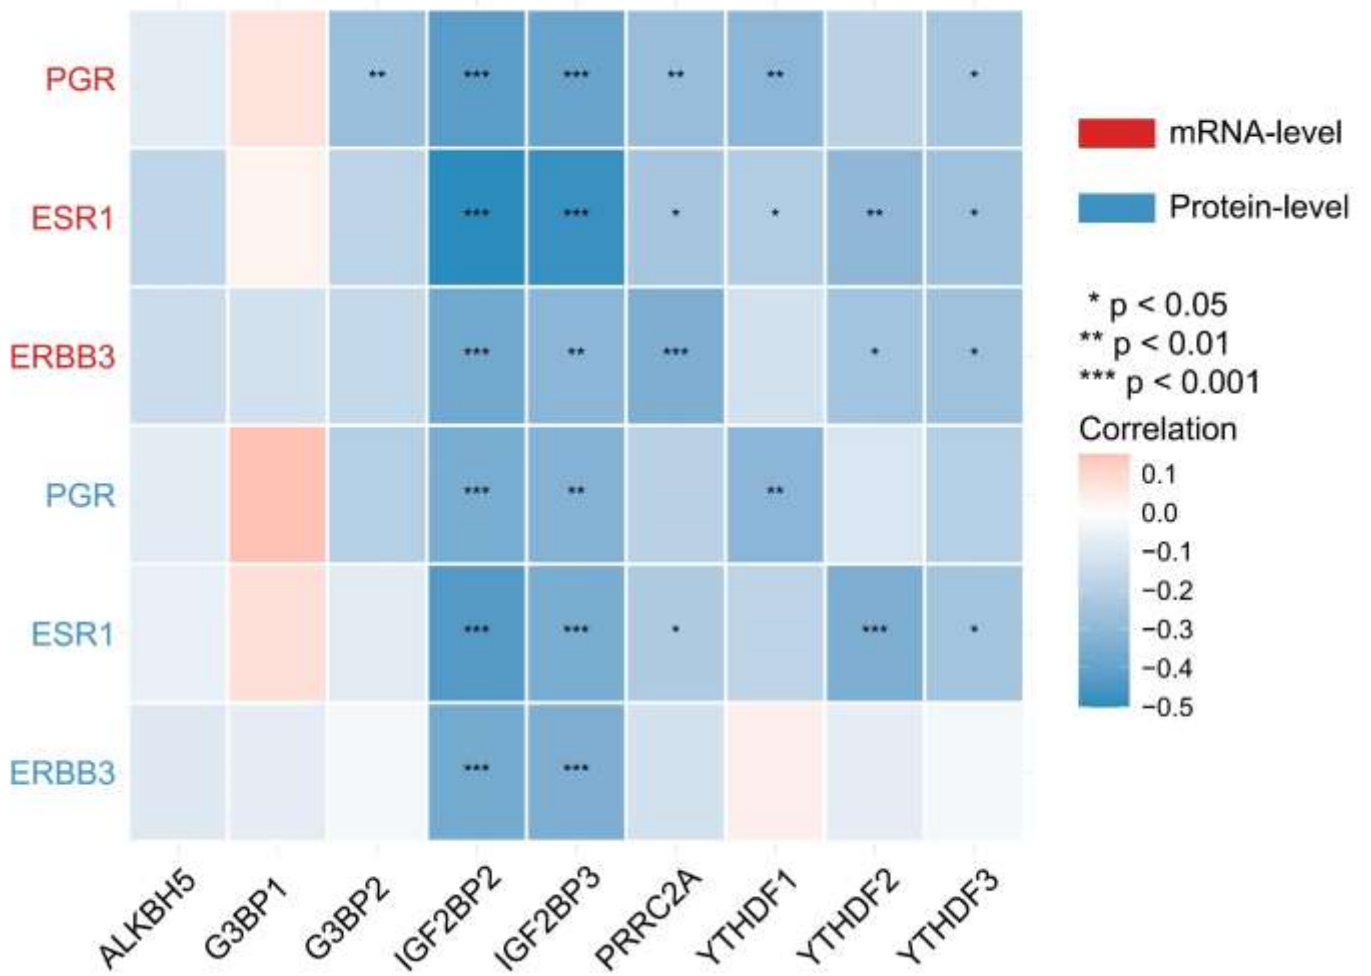

Figure S2. Nine significant m6A prognostic proteins differed in abundance between LUAD and LUSC.

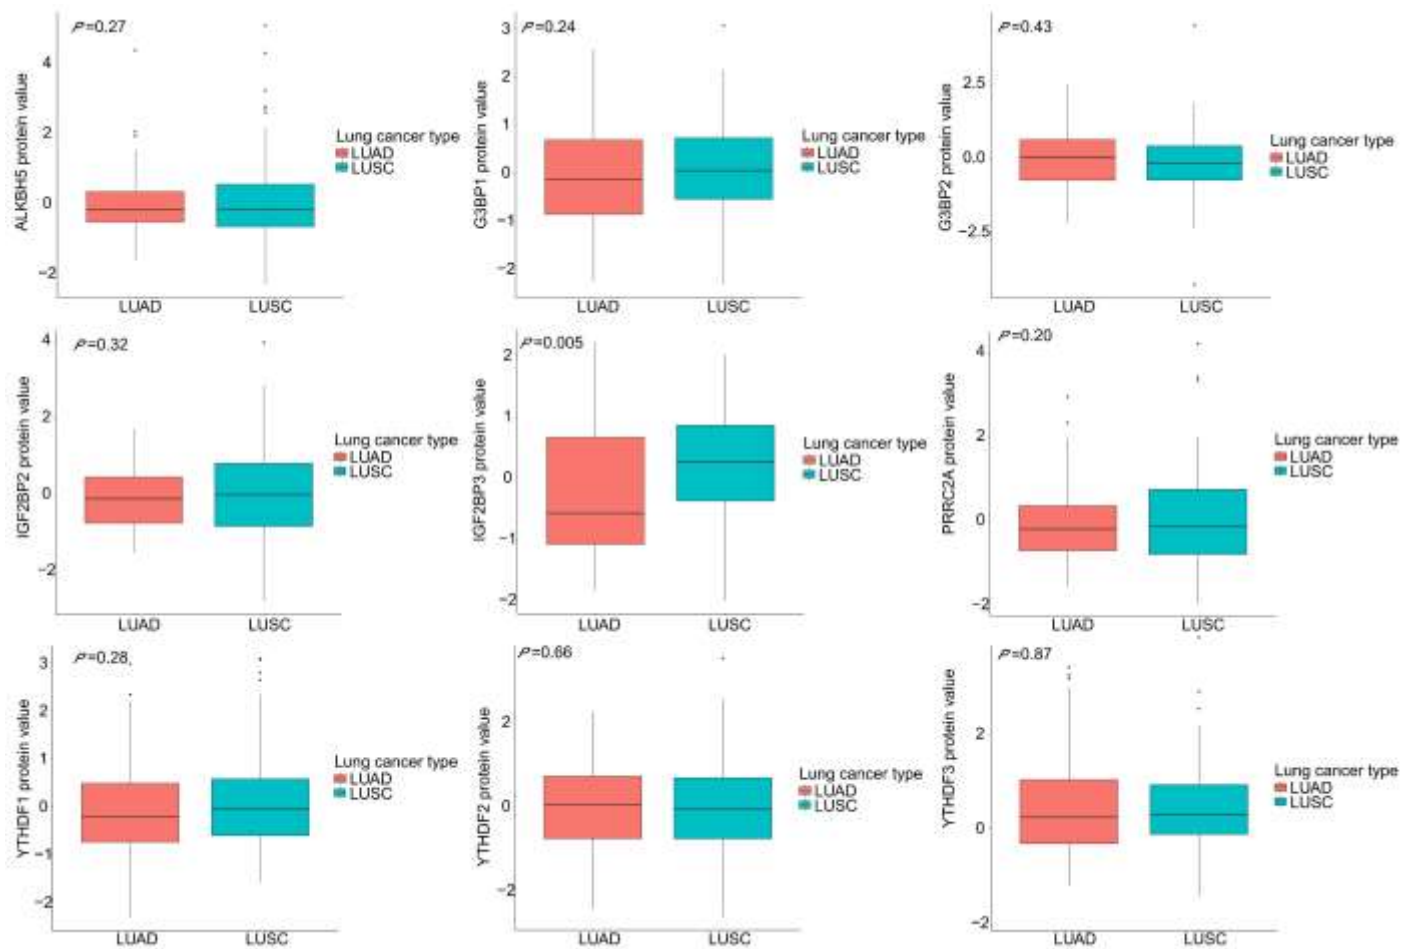

Figure S3. Kaplan-Meier survival analysis of *m6A*score in CPTAC project

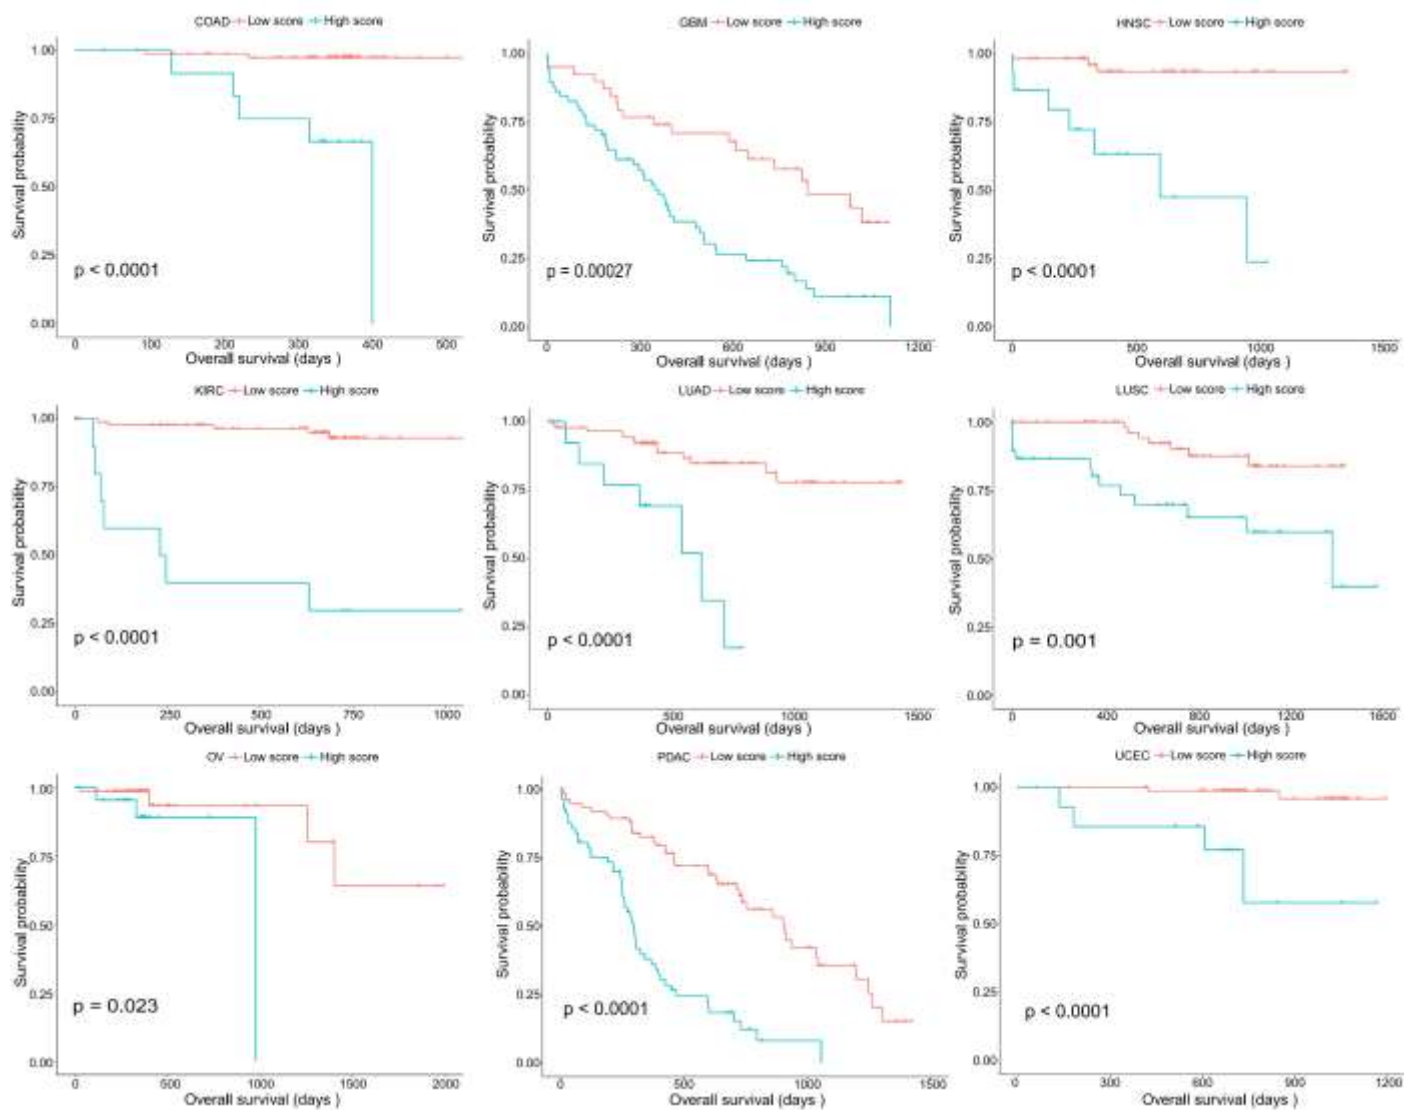



**Figure S4. The OncoScore system to evaluate 51 potential proteins**

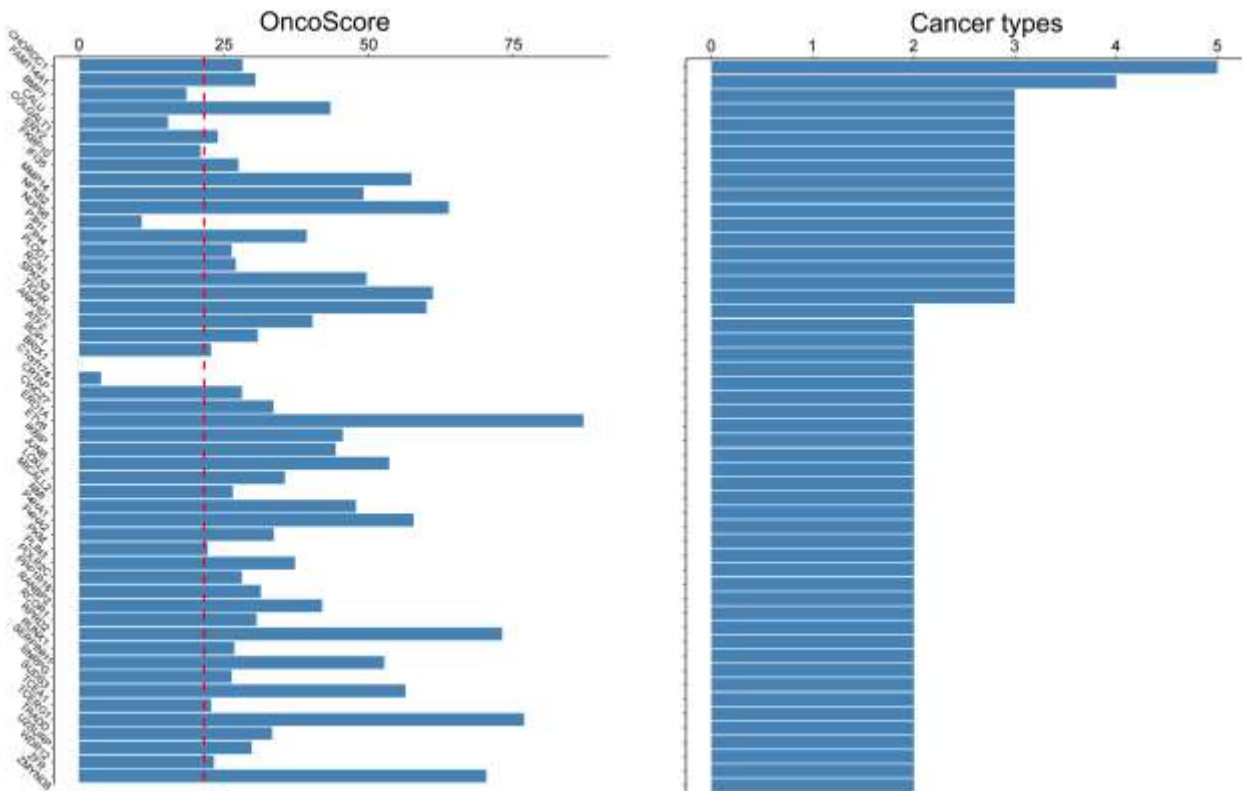

Figure S5. Somatic mutation frequency analysis of 51 potential regulators

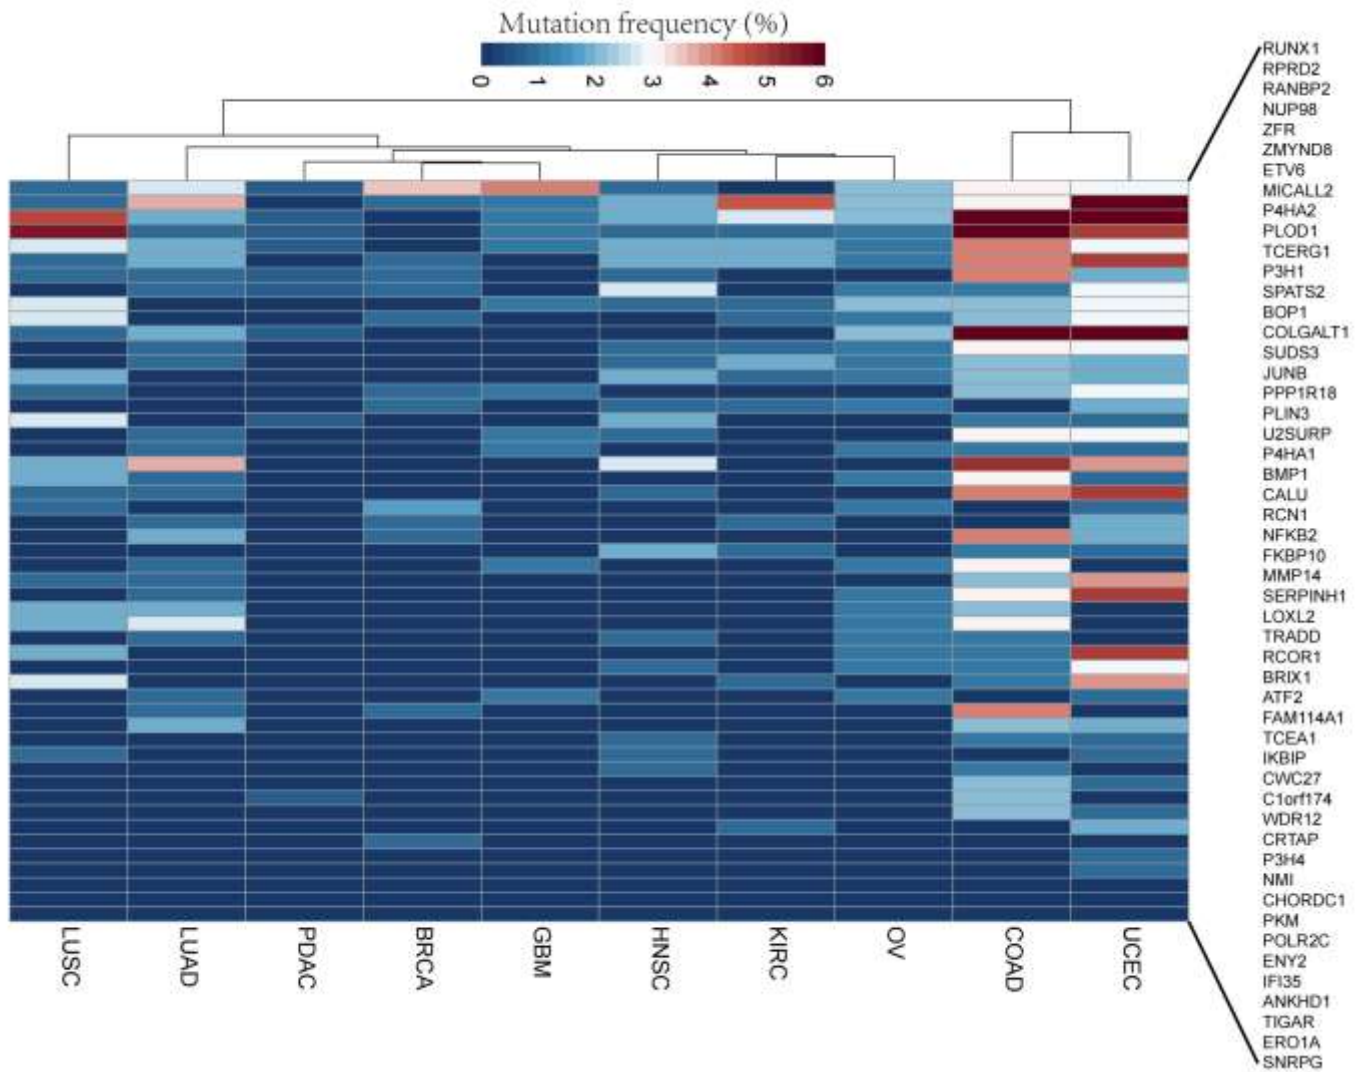

Figure S6. Kaplan-Meier survival analysis of CHORDC1 protein in CPTAC project

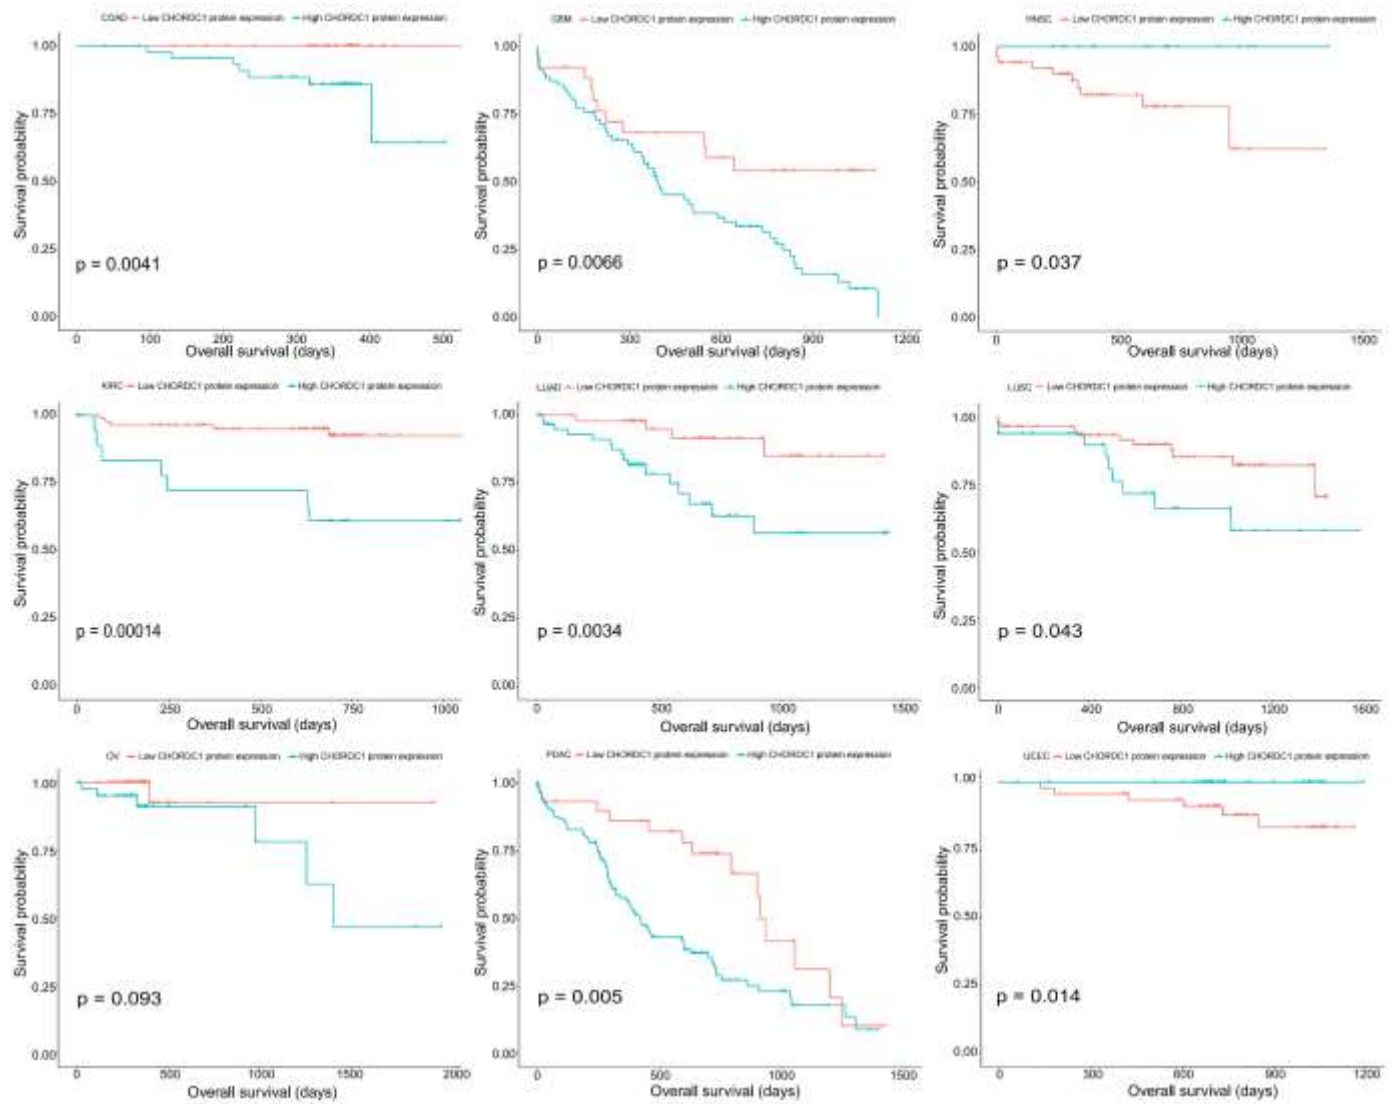

**Figure S7. Meta-analysis of the associations of CHORDC1 protein expression and overall survival in CPTAC project**

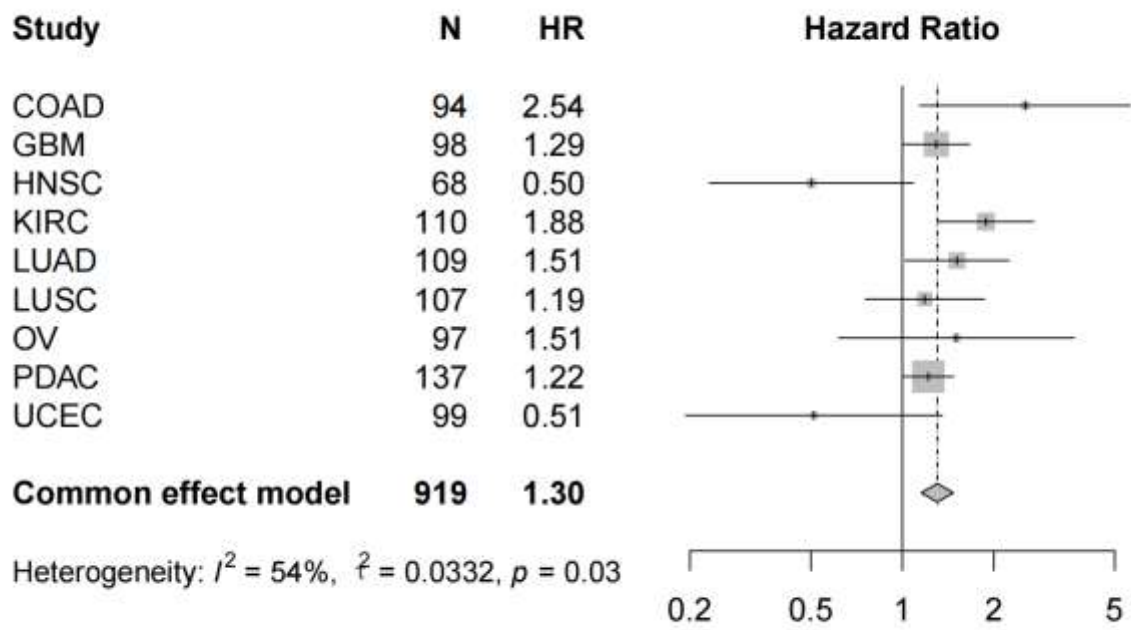

Figure S8. Correlation between ROCK1 protein expression and CHORDC1 protein expression

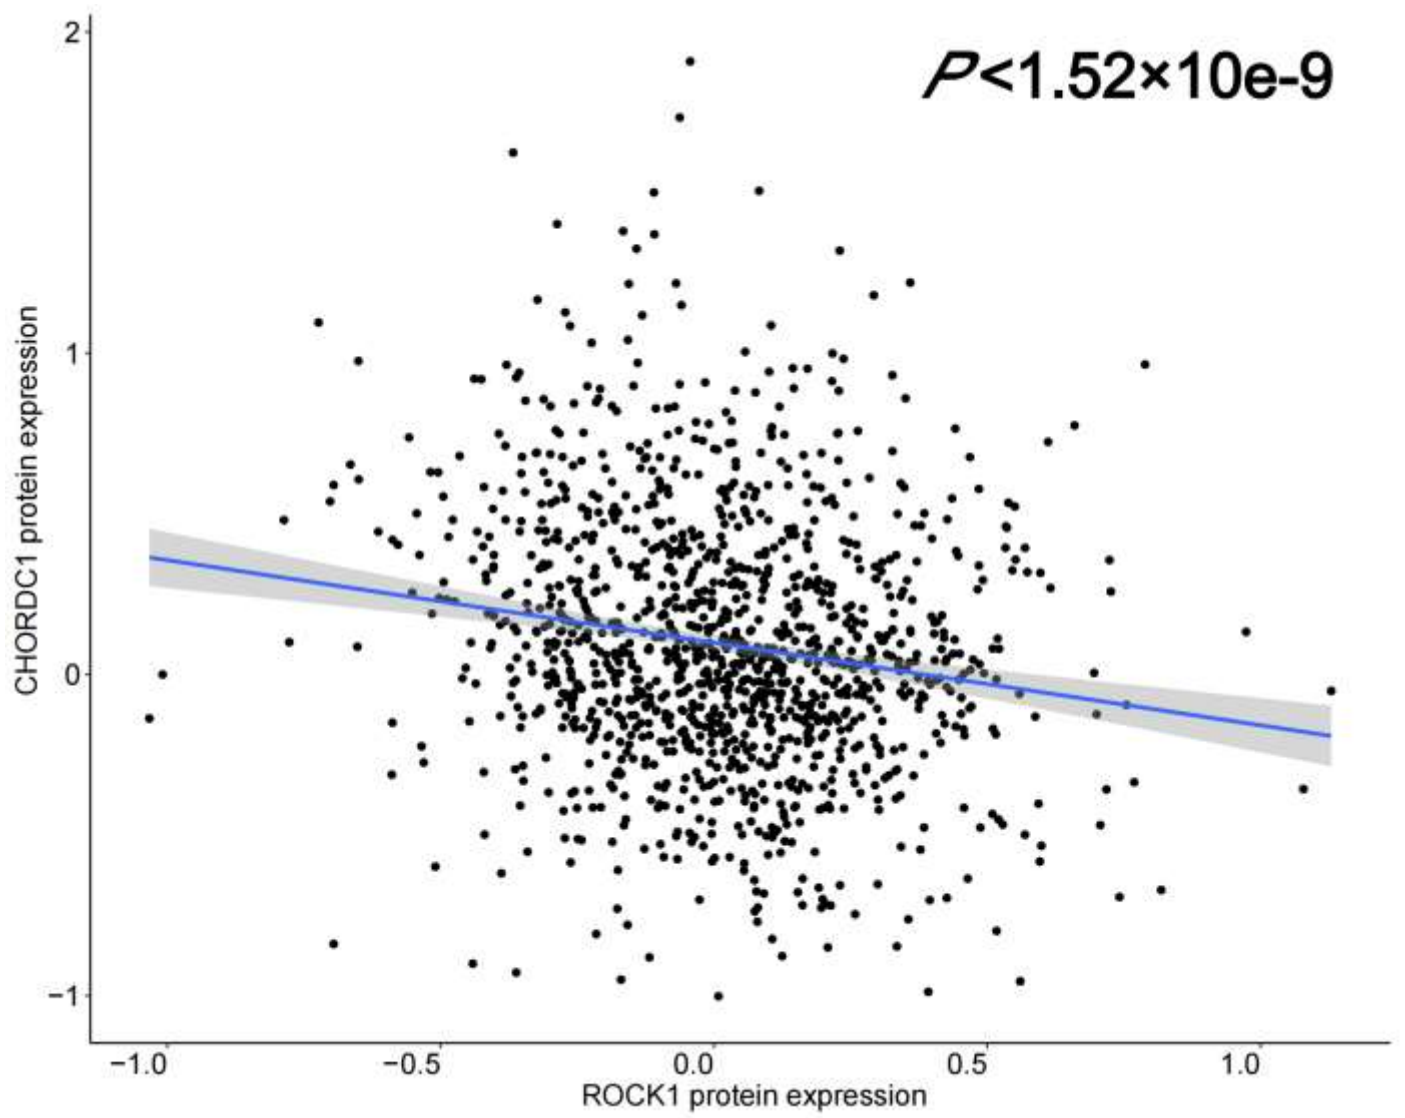

Figure S9. The 17 known biological pathways that are associated with the CHORDC1 protein expression

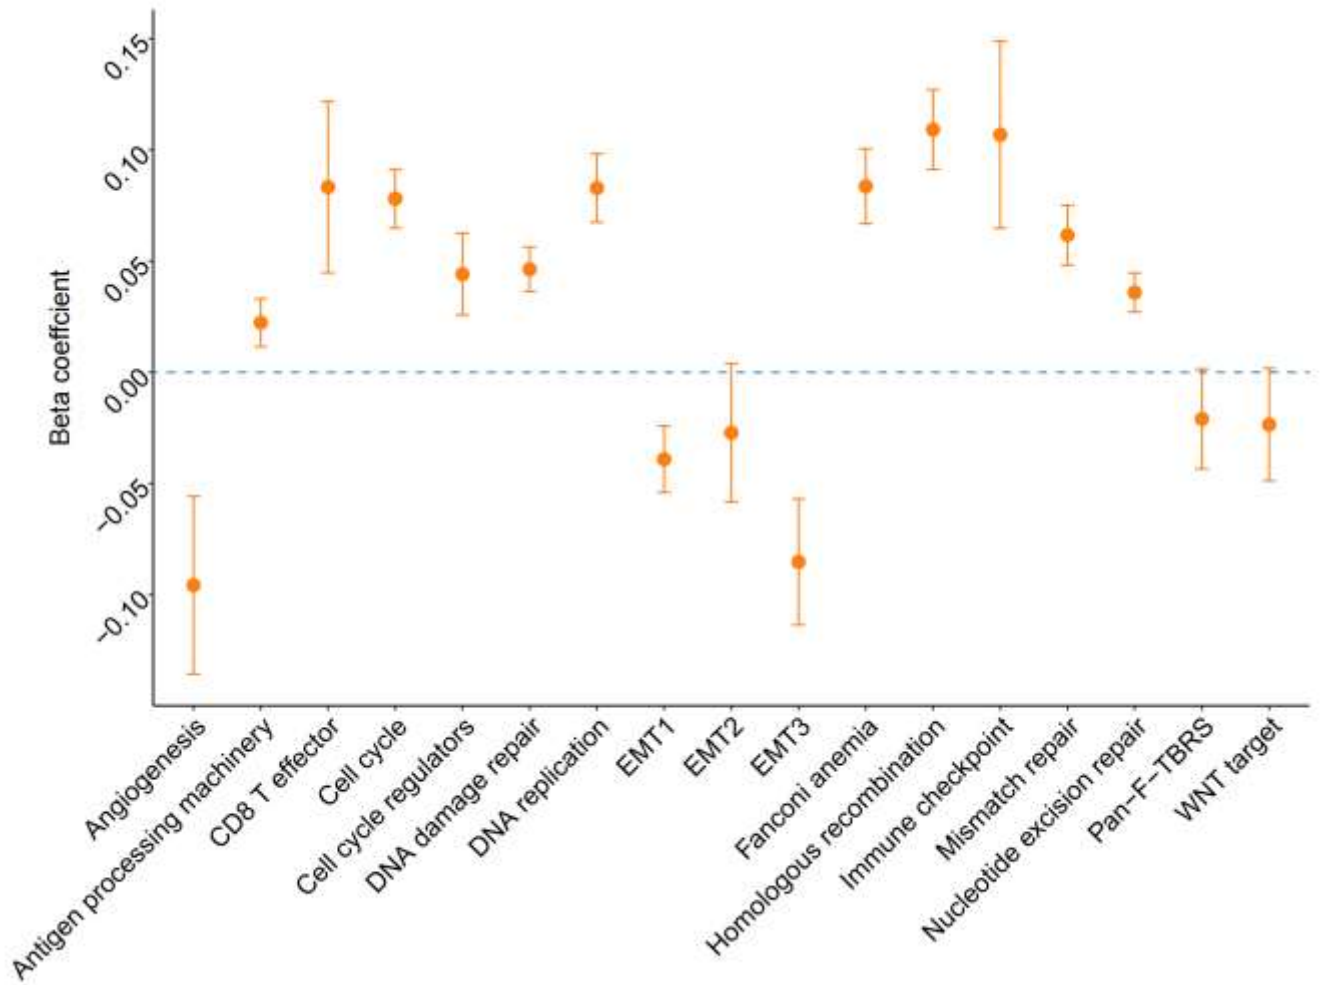

Supplement: d3mo00171g1.pdf [file d3mo00171g1.pdf]
